# Supplementary material
Source: Springer Nature journal article supplement (https://www.springermedizin.de/resource/supplementary/13058_2011_2965_MOESM8_ESM.pdf/9702894)

A.

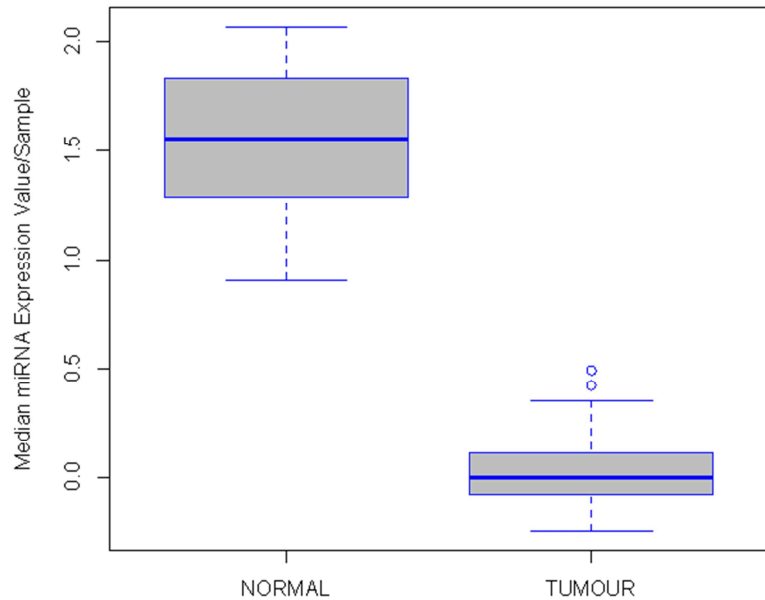

B.

MIR299-5P; FDR=5.7e-17

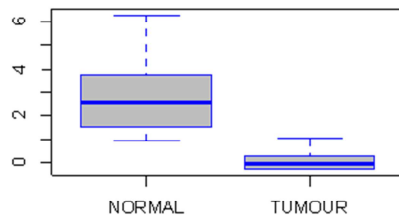

C.

MIR215; FDR=4.6e-09

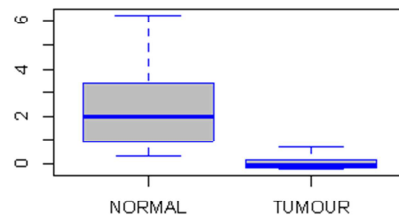

D.

MIR411; FDR=2.9e-11

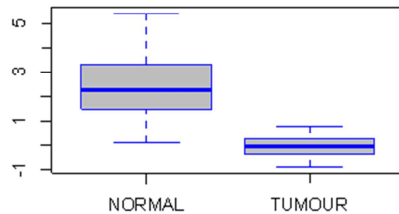

E.

MIR452; FDR=8.6e-10

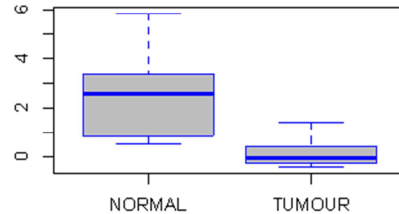

Supplement: MOESM8 [file 9702894]
